# Supplementary material
Source: Springer Nature journal article supplement (https://www.springermedizin.de/resource/supplementary/12985_2014_2397_MOESM2_ESM.pdf/9606984)
Supplement: MOESM2 [file 9606984]

| Name    | Oligo                       | Sequence 5' - 3'                                                                      | Accession number  | PCR efficiency | Reference |
|---------|-----------------------------|---------------------------------------------------------------------------------------|-------------------|----------------|-----------|
| FIV gag | Forward<br>Reverse<br>Probe | GCAGAAGCAAGATTTGCACCA<br>TATGGCGGCAATTTTCCT<br>FAM-TGCCTCAAGATACCATGCTCTACACTGCA-BHQ1 | M25381            | 1.021          | [38]      |
| RPP30   | Forward<br>Reverse<br>Probe | GCCAAGTGTGAGGGCTGAAA<br>GTGGACGGACTACCAAATGGA<br>HEX-CCAGTCCTCGTCAGCGCTCCCTTC-BHQ1    | XM_003994205      | 1.048          | -         |
| OASL    | Forward<br>Reverse          | GTGAAACATCGGCCAACCA<br>TGGCTTTCACGTAAGTGCAGGTA                                        | ENSFCAT0000009643 | 0.950          | -         |
| ACHE    | Forward<br>Reverse          | GTGCTCGGGTCTATGCCTACA<br>GCCCAAAGATGAACTCGATCTC                                       | ENSFCAG0000023546 | 1.001          | -         |
| TGM2    | Forward<br>Reverse          | CCCGAGTGGTGACCAACTATAAC<br>GCGGAAGTACTCGATGAGCAA                                      | ENSFCAT0000004809 | 1.029          | -         |
| HMG2    | Forward<br>Reverse          | AAGCTGATGCTGGCAAGGA<br>TCTGTGCTGGTCTGTTTTGG                                           | ENSFCAT0000032519 | 0.964          | -         |
| CDKN1A  | Forward<br>Reverse          | GGCAGACCAGCATGACAGATT<br>CAGATTAGGGCTTCCTCTTGA                                        | ENSFCAT0000025177 | 0.987          | -         |
| ZFP36   | Forward<br>Reverse          | CCACCCCAAGTACAAGACAGAAGT<br>GATGCTCTGGCGAAGCACAT                                      | ENSFCAT0000031857 | 0.939          | -         |
| BCL6    | Forward<br>Reverse          | CGTGATGGCTACGGCTATGTAC<br>CGGCTTCACTGGCTTGATA                                         | ENSFCAT0000006812 | 0.931          | -         |
| CSF1    | Forward<br>Reverse          | GATGGAGACTTCGTGCCAAATT<br>AGGTAGCACACGGGATCTTTCA                                      | ENSFCAT0000010774 | 0.923          | -         |
| IFI44   | Forward<br>Reverse          | ACACGTACAGGACATATCCATTAAGG<br>CTCATGCAGGCCATTGTG                                      | ENSFCAT0000027884 | 0.951          | -         |
| CXCL11  | Forward<br>Reverse          | ATTGTTCAAGGTTTCCCATGTT<br>GCTTTCTCAATATCTGCCACTTTCA                                   | ENSFCAT0000026314 | 1.032          | -         |
| ABL     | Forward<br>Reverse          | TGTGGCGAGTGGTGATAAATACAC<br>TCCACTCACCATTCTGGTTGTAA                                   | ENSFCAT0000005306 | 0.985          | [43]      |
| B2M     | Forward<br>Reverse          | CGCGTTTTGTGGTCTTGGT<br>AAACCTGAACCTTGGAGAATGC                                         | NM_001009876      | 0.953          | [43]      |
| RSP7    | Forward<br>Reverse          | GTCCCAGAAGCCGCACTTT<br>CACAAATCTCGCTCGGGAAAA                                          | NM_001009832      | 0.991          | [43]      |

Additional file 2
